# Supplementary material for: Global implementation survey of Integrated Management of Childhood Illness (IMCI): 20 years on
Source: PubMed Central journal article supplement (PMC6067364; doi:10.1136/bmjopen-2017-019079), 2018-07-30
Supplement: bmjopen-2017-019079supp002.pdf [file bmjopen-2017-019079supp002.pdf]

## Web Appendix

**Table 1. Response Rate to IMCI Global Implementation Survey**

| WHO Region            | Total number of WHO MS | Member States (N) to which a survey questionnaire was sent | WHO MS that responded* | WHO MS that reported no IMCI (did not participate in the survey) | WHO MS that responded IMCI not in national plan/no district implementing nor component implemented | Response rate |
|-----------------------|------------------------|------------------------------------------------------------|------------------------|------------------------------------------------------------------|----------------------------------------------------------------------------------------------------|---------------|
| African               | 47                     | 47                                                         | 45                     | 4                                                                |                                                                                                    | 95.7          |
| Americas              | 35                     | 33                                                         | 19                     | 4                                                                |                                                                                                    | 57.6          |
| Eastern Mediterranean | 21                     | 16                                                         | 14                     |                                                                  |                                                                                                    | 87.5          |
| Europe                | 53                     | 7                                                          | 6                      |                                                                  |                                                                                                    | 85.7          |
| South-east Asia       | 11                     | 11                                                         | 9                      |                                                                  |                                                                                                    | 81.8          |
| Western Pacific       | 27                     | 16                                                         | 11                     |                                                                  | 1                                                                                                  | 68.8          |
| <b>Total</b>          | <b>194</b>             | <b>130</b>                                                 | <b>104</b>             | <b>8</b>                                                         | <b>1</b>                                                                                           | <b>80.0</b>   |

MS = Member State; \* Includes those MSs that responded not having adopted IMCI and therefore not answering the questions of the survey

**Table 2. Respondents to IMCI Global Implementation Survey by WHO Region**

| WHO Region            | Questionnaires included in final analysis | Three-team response (MoH/WHO/UNICEF) | Response by MoH/WHO team | Response by MoH alone | Response by WHO alone | Response by WHO/UNICEF team | Unknown  |
|-----------------------|-------------------------------------------|--------------------------------------|--------------------------|-----------------------|-----------------------|-----------------------------|----------|
| African               | 41                                        | 1                                    | 1                        | 22                    | 14                    | -                           | 3        |
| Americas              | 15                                        | -                                    | 5                        | 9                     | 1                     | -                           | -        |
| Eastern Mediterranean | 14                                        | 3                                    | 7                        | 4                     | -                     | -                           | -        |
| Europe                | 6                                         | 1                                    | -                        | 3                     | 1                     | 1                           | -        |
| South-east Asia       | 9                                         | -                                    | -                        | 6                     | 3                     | -                           | -        |
| Western Pacific       | 10                                        | -                                    | 1                        | 9                     | -                     | -                           | -        |
| <b>Total</b>          | <b>95</b>                                 | <b>5</b>                             | <b>15</b>                | <b>52</b>             | <b>19</b>             | <b>1</b>                    | <b>3</b> |
